# Supplementary material for: External validation of a mobile clinical decision support system for diarrhea etiology prediction in children: A multicenter study in Bangladesh and Mali
Source: eLife journal article supplement (doi:10.7554/elife.72294), 2022-02-07

A. Bland-Altman Plot of MUAC on CRF vs. App

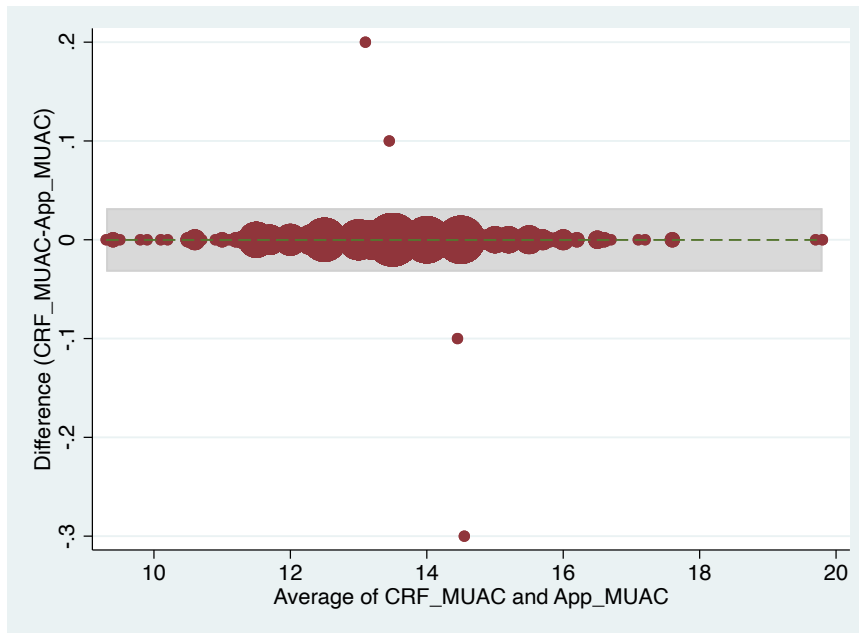

B. Bland-Altman Plot of Calculated Viral Risk on CRF vs. App at Mali study site.

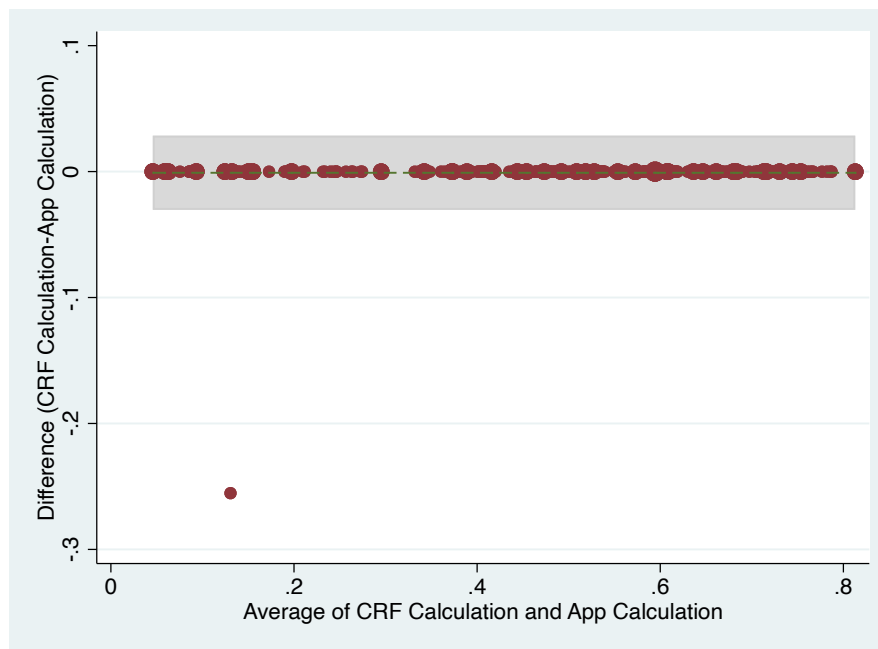

Supplement: supp [file elife-72294-supp-v1.zip]
