# Supplementary material for: External validation of a mobile clinical decision support system for diarrhea etiology prediction in children: A multicenter study in Bangladesh and Mali
Source: eLife. 2022 Feb 9;11:e72294. doi: 10.7554/eLife.72294 (PMC8903833; doi:10.7554/eLife.72294)
Supplement: Supplementary file 5. [file elife-72294-supp5.csv]

ID	viral	bacterial	parasite	viral_only	date	base_age	f4a_drh_blood	f4a_drh_vomit	f4b_muac	any_breast_fed	Gender	DiarrheaDays	DiarrheaHours	DiarrheaEpisodes	Form 2::fever1.1	Form 4::Medications	Form 4::MotherEducation	Form 4::FatherEducation	Form 4::PeopleAtHome	dt	Seasonal_sine	Seasonal_cosine	temp	temp.aggr	rain	rain.aggr	Site
1001	TRUE	FALSE	FALSE	1	43780	8	0	1	10.55	1	Female	4	0	20	1	Yes	5	5	5	4363	-0.337301069	0.941396829	25.7778701	26.31352504	0	0	6
1002	TRUE	FALSE	FALSE	1	43780	7	0	1	12.75	1	Male	4	0	20	1	Yes	5	9	3	4363	-0.337301069	0.941396829	25.7778701	26.31352504	0	0	6
1003	TRUE	FALSE	FALSE	1	43780	7	0	1	13.55	1	Male	3	0	25	1	Yes	9	5	4	4363	-0.337301069	0.941396829	25.7778701	26.31352504	0	0	6
1005	TRUE	FALSE	FALSE	1	43781	11	0	1	13.55	1	Male	5	0	15	1	Yes	10	12	5	4364	-0.321057654	0.947059651	25.8778701	26.29879617	0	0	6
1006	TRUE	FALSE	FALSE	1	43781	12	0	1	14.15	1	Female	3	0	20	1	Yes	12	5	3	4364	-0.321057654	0.947059651	25.8778701	26.29879617	0	0	6
1007	TRUE	FALSE	FALSE	1	43781	11	0	1	17.15	1	Male	3	0	15	1	Yes	8	16	5	4364	-0.321057654	0.947059651	25.8778701	26.29879617	0	0	6
1009	TRUE	FALSE	FALSE	1	43781	36	0	1	15.05	0	Male	3	0	15	1	Yes	12	14	15	4364	-0.321057654	0.947059651	25.8778701	26.29879617	0	0	6
1011	TRUE	FALSE	FALSE	1	43782	20	0	1	14.05	1	Female	5	0	15	1	Yes	8	6	5	4365	-0.304719233	0.952442223	26.10972165	26.24778424	0	0	6
1012	TRUE	FALSE	FALSE	1	43782	11	0	1	13.35	0	Female	3	0	20	1	Yes	2	3	7	4365	-0.304719233	0.952442223	26.10972165	26.24778424	0	0	6
1013	TRUE	FALSE	FALSE	1	43782	13	0	1	13.25	1	Female	3	0	15	1	Yes	5	8	5	4365	-0.304719233	0.952442223	26.10972165	26.24778424	0	0	6
1014	TRUE	FALSE	FALSE	1	43782	12	0	1	14.05	1	Female	3	0	7	1	Yes	4	5	4	4365	-0.304719233	0.952442223	26.10972165	26.24778424	0	0	6
1015	FALSE	TRUE	FALSE	0	43782	19	0	1	13.55	1	Male	6	0	10	1	No	7	9	6	4365	-0.304719233	0.952442223	26.10972165	26.24778424	0	0	6
1016	TRUE	TRUE	FALSE	0	43782	10	0	1	14.75	1	Female	5	0	15	1	Yes	10	8	13	4365	-0.304719233	0.952442223	26.10972165	26.24778424	0	0	6
1017	TRUE	TRUE	FALSE	0	43783	8	0	1	14.05	1	Female	0	9	15	1	Yes	12	14	4	4366	-0.288290641	0.957542953	26.53981443	26.17376303	0	0	6
1018	TRUE	TRUE	FALSE	0	43783	10	0	1	12.8	1	Female	1	0	25	1	Yes	12	10	4	4366	-0.288290641	0.957542953	26.53981443	26.17376303	0	0	6
1019	TRUE	FALSE	FALSE	1	43783	12	0	1	12.55	1	Female	4	0	15	1	Yes	10	6	15	4366	-0.288290641	0.957542953	26.53981443	26.17376303	0	0	6
1020	FALSE	FALSE	TRUE	0	43783	24	0	1	14.65	0	Male	1	0	20	1	Yes	10	5	4	4366	-0.288290641	0.957542953	26.53981443	26.17376303	0	0	6
1021	TRUE	FALSE	FALSE	1	43783	11	0	1	12.85	1	Male	6	0	10	1	Yes	8	10	7	4366	-0.288290641	0.957542953	26.53981443	26.17376303	0	0	6
1022	TRUE	FALSE	FALSE	1	43783	12	0	1	13.7	1	Male	3	0	8	1	Yes	5	10	5	4366	-0.288290641	0.957542953	26.53981443	26.17376303	0	0	6
1023	TRUE	FALSE	FALSE	1	43786	15	0	1	13.25	1	Female	0	20	15	1	Yes	5	2	5	4369	-0.238512575	0.971139409	25.33185154	25.93216907	0	0	6
1024	TRUE	FALSE	FALSE	1	43786	5	0	1	13.55	0	Male	1	0	15	1	Yes	10	3	4	4369	-0.238512575	0.971139409	25.33185154	25.93216907	0	0	6
1025	TRUE	FALSE	FALSE	1	43786	18	0	1	14.15	1	Male	3	0	10	1	Yes	6	12	5	4369	-0.238512575	0.971139409	25.33185154	25.93216907	0	0	6
1026	FALSE	TRUE	FALSE	0	43786	24	0	1	12.85	1	Male	2	0	6	1	No	7	5	5	4369	-0.238512575	0.971139409	25.33185154	25.93216907	0	0	6
1027	TRUE	FALSE	FALSE	1	43786	36	0	1	14.05	0	Male	0	15	15	1	Yes	5	10	7	4369	-0.238512575	0.971139409	25.33185154	25.93216907	0	0	6
1031	TRUE	FALSE	FALSE	1	43787	2	0	1	11.55	1	Female	3	0	20	1	Yes	5	0	3	4370	-0.221772158	0.975098513	24.73185154	25.84759234	0	0	6
1030	TRUE	FALSE	FALSE	1	43787	13	0	1	14.5	0	Male	2	0	15	1	Yes	6	2	9	4370	-0.221772158	0.975098513	24.73185154	25.84759234	0	0	6
1033	FALSE	TRUE	FALSE	0	43787	6	1	1	15.55	1	Male	5	0	10	1	Yes	5	10	3	4370	-0.221772158	0.975098513	24.73185154	25.84759234	0	0	6
1034	TRUE	TRUE	FALSE	0	43787	12	0	1	13.5	1	Male	1	0	12	1	Yes	4	2	5	4370	-0.221772158	0.975098513	24.73185154	25.84759234	0	0	6
1035	TRUE	TRUE	FALSE	0	43788	12	0	1	13.05	0	Female	3	0	15	1	Yes	4	12	10	4371	-0.204966114	0.97876907	24.4778701	25.67344551	0	0	6
1037	TRUE	FALSE	FALSE	1	43788	8	0	1	12.9	1	Female	5	0	10	1	Yes	10	5	4	4371	-0.204966114	0.97876907	24.4778701	25.67344551	0	0	6
1038	TRUE	TRUE	FALSE	0	43788	24	0	1	13.15	0	Female	1	0	20	1	Yes	10	12	5	4371	-0.204966114	0.97876907	24.4778701	25.67344551	0	0	6
1040	TRUE	TRUE	FALSE	0	43788	10	0	1	13.75	1	Male	2	0	25	1	No	10	10	3	4371	-0.204966114	0.97876907	24.4778701	25.67344551	0	0	6
1042	TRUE	FALSE	FALSE	1	43789	13	0	1	12.55	1	Male	0	8	10	1	Yes	12	8	12	4372	-0.188099418	0.982149993	23.74777732	25.4883	0	0	6
1043	TRUE	FALSE	FALSE	1	43789	22	0	1	14.1	1	Female	2	0	10	1	Yes	5	2	5	4372	-0.188099418	0.982149993	23.74777732	25.4883	0	0	6
1044	FALSE	TRUE	FALSE	0	43789	36	0	1	13.55	0	Female	1	0	10	1	No	5	3	4	4372	-0.188099418	0.982149993	23.74777732	25.4883	0	0	6
1045	TRUE	FALSE	FALSE	1	43789	8	0	1	12.85	0	Male	4	0	15	1	Yes	2	4	4	4372	-0.188099418	0.982149993	23.74777732	25.4883	0	0	6
1046	TRUE	FALSE	FALSE	1	43790	11	0	1	14.55	0	Male	3	0	7	0	Yes	10	5	9	4373	-0.17117706	0.985240283	24.16194433	25.3158595	0	0	6
1047	TRUE	FALSE	FALSE	1	43790	9	0	1	13.45	1	Male	3	0	20	1	Yes	10	10	6	4373	-0.17117706	0.985240283	24.16194433	25.3158595	0	0	6
1048	TRUE	FALSE	FALSE	1	43790	6	0	1	14.45	1	Male	3	0	20	1	Yes	10	8	14	4373	-0.17117706	0.985240283	24.16194433	25.3158595	0	0	6
1049	TRUE	FALSE	FALSE	1	43790	6	0	1	12.65	1	Female	3	0	15	1	Yes	3	5	6	4373	-0.17117706	0.985240283	24.16194433	25.3158595	0	0	6
1050	TRUE	FALSE	FALSE	1	43790	17	0	1	15.1	1	Male	2	0	25	1	Yes	16	16	6	4373	-0.17117706	0.985240283	24.16194433	25.3158595	0	0	6
1051	TRUE	FALSE	FALSE	1	43793	48	0	1	13.4	0	Female	2	0	20	1	No	0	2	5	4376	-0.120126165	0.992758634	24.09379587	25.0329891	0	0	6
1052	TRUE	FALSE	FALSE	1	43793	14	0	1	15.35	0	Male	1	0	20	1	Yes	10	7	5	4376	-0.120126165	0.992758634	24.09379587	25.0329891	0	0	6
1053	FALSE	TRUE	FALSE	0	43793	13	0	1	13.25	1	Male	3	0	25	1	Yes	12	12	5	4376	-0.120126165	0.992758634	24.09379587	25.0329891	0	0	6
1054	TRUE	FALSE	FALSE	1	43793	36	0	1	15.1	0	Female	2	0	10	1	Yes	12	16	5	4376	-0.120126165	0.992758634	24.09379587	25.0329891	0	0	6
1057	TRUE	FALSE	FALSE	1	43794	13	0	1	11.95	1	Female	4	0	20	1	Yes	12	14	6	4377	-0.103031379	0.994678106	24.14777732	25.05884227	0	0	6
1058	FALSE	TRUE	FALSE	0	43794	8	0	1	13.35	1	Male	0	18	20	1	No	9	16	3	4377	-0.103031379	0.994678106	24.14777732	25.05884227	0	0	6
1060	FALSE	TRUE	FALSE	0	43794	24	0	1	15.55	0	Male	2	0	15	1	Yes	12	10	7	4377	-0.103031379	0.994678106	24.14777732	25.05884227	0	0	6
1061	TRUE	FALSE	FALSE	1	43794	13	0	1	14.55	1	Female	5	0	20	0	Yes	10	0	5	4377	-0.103031379	0.994678106	24.14777732	25.05884227	0	0	6
1062	TRUE	FALSE	FALSE	1	43794	20	0	1	13.2	1	Male	2	0	15	1	No	12	12	5	4377	-0.103031379	0.994678106	24.14777732	25.05884227	0	0	6
1063	TRUE	FALSE	FALSE	1	43795	15	0	1	13.15	1	Male	1	0	25	1	Yes	12	12	4	4378	-0.085906104	0.996303238	23.69379587	24.94240707	0	0	6
1065	TRUE	FALSE	FALSE	1	43795	13	0	1	13.25	1	Male	2	0	20	1	Yes	8	10	7	4378	-0.085906104	0.996303238	23.69379587	24.94240707	0	0	6
1066	TRUE	FALSE	FALSE	1	43795	10	0	1	12.05	1	Male	4	0	20	1	Yes	5	10	4	4378	-0.085906104	0.996303238	23.69379587	24.94240707	0	0	6
1067	TRUE	TRUE	FALSE	0	43795	11	0	1	14.1	1	Female	2	0	25	1	No	9	5	5	4378	-0.085906104	0.996303238	23.69379587	24.94240707	0	0	6
1068	TRUE	TRUE	FALSE	0	43795	7	0	1	15.15	1	Female	1	0	15	1	Yes	10	8	6	4378	-0.085906104	0.996303238	23.69379587	24.94240707	0	0	6
1069	TRUE	FALSE	FALSE	1	43796	9	0	1	12.35	1	Male	3	0	15	1	Yes	3	0	4	4379	-0.068755408	0.997633547	24.26194433	24.78640177	0	0	6
1070	TRUE	TRUE	FALSE	0	43796	18	0	1	13.55	1	Male	3	0	15	1	Yes	5	5	3	4379	-0.068755408	0.997633547	24.26194433	24.78640177	0	0	6
1071	TRUE	TRUE	FALSE	0	43796	10	0	1	13.85	1	Male	3	0	20	1	Yes	6	10	7	4379	-0.068755408	0.997633547	24.26194433	24.78640177	0	0	6
1072	TRUE	FALSE	FALSE	1	43796	15	0	1	13.45	1	Male	1	0	20	1	Yes	2	3	6	4379	-0.068755408	0.997633547	24.26194433	24.78640177	0	0	6
1073	TRUE	FALSE	FALSE	1	43796	12	0	1	13.1	1	Male	2	0	18	1	Yes	8	5	9	4379	-0.068755408	0.997633547	24.26194433	24.78640177	0	0	6
1074	TRUE	FALSE	FALSE	1	43797	24	0	1	14.05	1	Male	1	0	10	1	Yes	4	8	8	4380	-0.051584367	0.99866864	24.56194433	24.65441767	0	0	6
1075	TRUE	FALSE	FALSE	1	43797	10	0	1	12.45	1	Male	4	0	13	1	No	7	5	9	4380	-0.051584367	0.99866864	24.56194433	24.65441767	0	0	6
1076	TRUE	FALSE	FALSE	1	43797	24	0	1	13.55	1	Female	2	0	10	1	Yes	2	8	5	4380	-0.051584367	0.99866864	24.56194433	24.65441767	0	0	6
1077	TRUE	FALSE	FALSE	1	43797	17	0	1	14.05	1	Male	3	0	20	1	Yes	8	8	3	4380	-0.051584367	0.99866864	24.56194433	24.65441767	0	0	6
1078	TRUE	FALSE	FALSE	1	43797	7	0	1	12.25	1	Female	4	0	15	1	Yes	10	10	5	4380	-0.051584367	0.99866864	24.56194433	24.65441767	0	0	6
1079	TRUE	FALSE	FALSE	1	43800	8	0	1	14.55	1	Male	2	0	20	0	Yes	10	5	3	4383	-2.93906E-15	1	23.60175876	24.25100501	0	0	6
1080	TRUE	FALSE	FALSE	1	43800	8	0	1	12.25	0	Male	3	0	15	1	Yes	6	10	4	4383	-2.93906E-15	1	23.60175876	24.25100501	0	0	6
1082	TRUE	FALSE	FALSE	1	43800	7	0	1	12.55	1	Male	4	0	15	1	Yes	7	8	7	4383	-2.93906E-15	1	23.60175876	24.25100501	0	0	6
1083	TRUE	FALSE	FALSE	1	43800	10	0	1	14.45	1	Male	2	0	15	1	Yes	18	5	5	4383	-2.93906E-15	1	23.60175876	24.25100501	0	0	6
1084	TRUE	FALSE	FALSE	1	43801	6	0	1	13.05	1	Male	1	0	8	1	Yes	8	5	3	4384	0.017201575	0.999852042	22.33185154	24.12742695	0	0	6
1085	TRUE	FALSE	FALSE	1	43801	12	0	1	13.1	1	Female	4	0	12	1	Yes	5	5	4	4384	0.017201575	0.999852042	22.33185154	24.12742695	0	0	6
1086	TRUE	FALSE	FALSE	1	43801	11	0	1	12.45	1	Female	3	0	15	1	Yes	5	6	6	4384	0.017201575	0.999852042	22.33185154	24.12742695	0	0	6
1087	TRUE	FALSE	FALSE	1	43801	10	0	1	13.05	1	Male	2	0	10	1	Yes	8	3	4	4384	0.017201575	0.999852042	22.33185154	24.12742695	0	0	6
1088	TRUE	TRUE	FALSE	0	43802	48	1	1	17.6	0	Male	1	0	20	1	No	5	0	5	4385	0.034398061	0.999408212	21.64777732	23.95599838	0	0	6
1089	TRUE	FALSE	FALSE	1	43802	12	0	0	14.05	0	Female	3	0	20	1	Yes	2	8	3	4385	0.034398061	0.999408212	21.64777732	23.95599838	0	0	6
1090	TRUE	FALSE	FALSE	1	43802	15	0	0	12.35	1	Male	3	0	15	1	Yes	16	18	6	4385	0.034398061	0.999408212	21.64777732	23.95599838	0	0	6
1091	TRUE	FALSE	FALSE	1	43802	16	0	1	12.9	1	Male	4	0	15	1	Yes	10	12	7	4385	0.034398061	0.999408212	21.64777732	23.95599838	0	0	6
1093	TRUE	FALSE	FALSE	1	43802	11	0	1	12.4	1	Female	3	0	20	1	Yes	2	3	6	4385	0.034398061	0.999408212	21.64777732	23.95599838	0	0	6
1095	TRUE	FALSE	FALSE	1	43803	10	0	1	13.55	0	Female	4	0	20	1	Yes	6	2	5	4386	0.051584367	0.99866864	21.3778701	23.75384889	0	0	6
1096	TRUE	FALSE	FALSE	1	43803	7	0	1	13.75	1	Male	2	0	25	1	Yes	8	2	5	4386	0.051584367	0.99866864	21.3778701	23.75384889	0	0	6
1097	TRUE	FALSE	FALSE	1	43803	9	0	1	13.3	1	Male	2	0	20	1	Yes	2	2	7	4386	0.051584367	0.99866864	21.3778701	23.75384889	0	0	6
1098	TRUE	FALSE	FALSE	1	43803	10	0	0	13.7	1	Female	1	0	15	1	No	5	3	5	4386	0.051584367	0.99866864	21.3778701	23.75384889	0	0	6
1099	TRUE	FALSE	FALSE	1	43804	24	0	0	16.5	1	Male	3	0	20	1	Yes	10	10	4	4387	0.068755408	0.997633547	23.26194433	23.58456981	0	0	6
1100	TRUE	FALSE	FALSE	1	43804	8	0	1	12.65	1	Female	1	0	16	1	No	8	8	7	4387	0.068755408	0.997633547	23.26194433	23.58456981	0	0	6
1101	TRUE	FALSE	FALSE	1	43804	10	0	1	14.15	0	Female	0	8	15	1	Yes	10	5	3	4387	0.068755408	0.997633547	23.26194433	23.58456981	0	0	6
1102	TRUE	FALSE	FALSE	1	43804	9	0	1	14.15	1	Male	2	0	30	1	Yes	10	8	10	4387	0.068755408	0.997633547	23.26194433	23.58456981	0	0	6
1103	TRUE	FALSE	FALSE	1	43804	23	0	1	13.4	1	Female	3	0	12	1	Yes	12	10	5	4387	0.068755408	0.997633547	23.26194433	23.58456981	0	0	6
1104	TRUE	FALSE	FALSE	1	43804	5	0	1	14.1	1	Female	2	0	18	1	Yes	3	5	5	4387	0.068755408	0.997633547	23.26194433	23.58456981	0	0	6
1105	TRUE	TRUE	FALSE	0	43807	7	0	0	14.55	0	Male	4	0	15	1	Yes	2	0	4	4390	0.120126165	0.992758634	23.20796289	23.45928542	0	0	6
1106	TRUE	FALSE	FALSE	1	43807	11	0	0	12.45	1	Female	3	0	18	0	No	8	5	6	4390	0.120126165	0.992758634	23.20796289	23.45928542	0	0	6
1108	TRUE	TRUE	FALSE	0	43807	9	0	1	12.25	1	Male	1	0	15	1	Yes	6	0	3	4390	0.120126165	0.992758634	23.20796289	23.45928542	0	0	6
1110	TRUE	FALSE	FALSE	1	43808	6	0	1	12.35	1	Female	2	0	20	1	Yes	7	5	6	4391	0.137185404	0.990545388	22.13185154	23.39601163	0	0	6
1111	TRUE	FALSE	FALSE	1	43808	4	0	0	14.55	1	Male	5	0	15	1	No	10	10	5	4391	0.137185404	0.990545388	22.13185154	23.39601163	0	0	6
1112	TRUE	FALSE	FALSE	1	43808	19	0	1	14.15	1	Male	2	0	10	1	Yes	10	8	5	4391	0.137185404	0.990545388	22.13185154	23.39601163	0	0	6
1113	TRUE	FALSE	FALSE	1	43808	8	0	1	12.4	0	Female	2	0	12	1	Yes	9	9	4	4391	0.137185404	0.990545388	22.13185154	23.39601163	0	0	6
1114	TRUE	FALSE	FALSE	1	43808	17	0	1	15.45	0	Female	1	0	20	1	Yes	10	12	5	4391	0.137185404	0.990545388	22.13185154	23.39601163	0	0	6
1116	FALSE	TRUE	FALSE	0	43809	24	0	1	16.1	0	Female	2	0	25	1	No	12	12	7	4392	0.154204048	0.988039023	21.86990722	23.25201694	0	0	6
1117	TRUE	FALSE	FALSE	1	43809	4	0	1	13.45	0	Male	1	0	12	1	No	8	10	3	4392	0.154204048	0.988039023	21.86990722	23.25201694	0	0	6
1118	TRUE	FALSE	FALSE	1	43809	15	0	1	15.2	1	Male	2	0	30	1	Yes	10	5	6	4392	0.154204048	0.988039023	21.86990722	23.25201694	0	0	6
1119	TRUE	FALSE	FALSE	1	43809	20	0	1	13.55	1	Female	3	0	15	1	Yes	7	5	3	4392	0.154204048	0.988039023	21.86990722	23.25201694	0	0	6
1120	TRUE	TRUE	FALSE	0	43809	7	0	1	11.75	0	Male	1	0	20	0	No	8	10	4	4392	0.154204048	0.988039023	21.86990722	23.25201694	0	0	6
1122	TRUE	FALSE	FALSE	1	43810	7	0	1	12.05	0	Female	7	0	25	1	No	10	8	5	4393	0.17117706	0.985240283	21.32388866	23.12173917	0	0	6
1123	TRUE	TRUE	FALSE	0	43810	23	0	0	13.3	1	Female	2	0	10	1	Yes	9	8	3	4393	0.17117706	0.985240283	21.32388866	23.12173917	0	0	6
1124	TRUE	FALSE	FALSE	1	43810	19	0	1	19.75	1	Female	1	0	10	1	Yes	5	5	5	4393	0.17117706	0.985240283	21.32388866	23.12173917	0	0	6
1125	TRUE	FALSE	FALSE	1	43810	6	0	1	12.5	1	Male	5	0	15	1	Yes	8	5	8	4393	0.17117706	0.985240283	21.32388866	23.12173917	0	0	6
1126	TRUE	TRUE	FALSE	0	43810	24	0	1	15.25	0	Male	1	0	15	1	Yes	5	0	5	4393	0.17117706	0.985240283	21.32388866	23.12173917	0	0	6
1127	TRUE	TRUE	FALSE	0	43810	5	0	1	12.55	1	Male	1	0	10	1	No	5	8	4	4393	0.17117706	0.985240283	21.32388866	23.12173917	0	0	6
1128	TRUE	FALSE	FALSE	1	43811	17	0	1	13.35	1	Male	4	0	30	0	Yes	16	16	4	4394	0.188099418	0.982149993	20.84777732	22.91187805	0	0	6
1129	TRUE	FALSE	FALSE	1	43811	2	0	0	11.25	1	Male	4	0	10	0	Yes	14	12	7	4394	0.188099418	0.982149993	20.84777732	22.91187805	0	0	6
1130	TRUE	FALSE	FALSE	1	43811	12	0	1	12.4	1	Female	2	0	15	1	Yes	2	8	6	4394	0.188099418	0.982149993	20.84777732	22.91187805	0	0	6
1131	TRUE	FALSE	FALSE	1	43811	7	0	1	12.45	1	Female	5	0	15	1	Yes	7	10	6	4394	0.188099418	0.982149993	20.84777732	22.91187805	0	0	6
1132	TRUE	TRUE	FALSE	0	43811	22	0	1	12.5	1	Male	2	0	22	0	No	7	5	4	4394	0.188099418	0.982149993	20.84777732	22.91187805	0	0	6
1133	TRUE	FALSE	FALSE	1	43814	12	0	1	14.05	1	Female	0	9	15	1	Yes	5	9	5	4397	0.238512575	0.971139409	22.12388866	22.21086613	0	0	6
1134	TRUE	FALSE	FALSE	1	43814	12	0	1	12.55	1	Female	3	0	10	1	Yes	6	8	3	4397	0.238512575	0.971139409	22.12388866	22.21086613	0	0	6
1136	TRUE	TRUE	FALSE	0	43814	24	0	0	13.6	1	Male	3	0	15	1	Yes	10	6	15	4397	0.238512575	0.971139409	22.12388866	22.21086613	0	0	6
1137	TRUE	FALSE	FALSE	1	43814	14	0	1	14.1	1	Male	3	0	10	1	Yes	8	10	7	4397	0.238512575	0.971139409	22.12388866	22.21086613	0	0	6
1138	FALSE	TRUE	FALSE	0	43815	8	0	0	12.85	0	Male	3	0	12	1	Yes	10	0	6	4398	0.255182413	0.966892929	21.63981443	22.10530397	0	0	6
1139	TRUE	FALSE	FALSE	1	43815	23	0	1	14.75	1	Male	4	0	12	0	Yes	9	5	7	4398	0.255182413	0.966892929	21.63981443	22.10530397	0	0	6
1140	TRUE	FALSE	FALSE	1	43815	9	0	1	13.6	1	Male	4	0	15	1	Yes	5	8	6	4398	0.255182413	0.966892929	21.63981443	22.10530397	0	0	6
1141	TRUE	FALSE	FALSE	1	43815	8	0	1	13.25	1	Male	3	0	15	1	Yes	10	12	3	4398	0.255182413	0.966892929	21.63981443	22.10530397	0	0	6
1143	TRUE	TRUE	TRUE	0	43816	12	0	1	13.1	0	Female	0	9	15	0	No	5	5	6	4399	0.271776738	0.96236033	20.89379587	22.05587275	0	0	6
1144	TRUE	FALSE	FALSE	1	43816	7	0	0	11.45	1	Male	2	0	12	1	Yes	8	10	14	4399	0.271776738	0.96236033	20.89379587	22.05587275	0	0	6
1145	TRUE	TRUE	TRUE	0	43816	7	0	1	13.1	0	Female	3	0	25	1	Yes	10	10	7	4399	0.271776738	0.96236033	20.89379587	22.05587275	0	0	6
1146	TRUE	TRUE	FALSE	0	43816	12	0	1	13.9	1	Female	3	0	15	1	Yes	12	10	4	4399	0.271776738	0.96236033	20.89379587	22.05587275	0	0	6
1147	TRUE	FALSE	FALSE	1	43816	8	0	1	13.05	1	Male	2	0	18	0	Yes	5	6	3	4399	0.271776738	0.96236033	20.89379587	22.05587275	0	0	6
1148	TRUE	TRUE	FALSE	0	43817	7	0	1	14.45	1	Male	0	8	15	1	Yes	6	9	7	4400	0.288290641	0.957542953	16.88583299	22.00201694	0	0	6
1149	TRUE	FALSE	FALSE	1	43817	14	0	1	13.45	1	Male	3	0	15	1	Yes	5	2	8	4400	0.288290641	0.957542953	16.88583299	22.00201694	0	0	6
1150	TRUE	FALSE	FALSE	1	43817	12	0	1	14.25	1	Female	3	0	12	1	Yes	8	12	3	4400	0.288290641	0.957542953	16.88583299	22.00201694	0	0	6
1151	TRUE	TRUE	FALSE	0	43817	17	0	1	13.45	1	Male	2	0	12	1	Yes	14	14	4	4400	0.288290641	0.957542953	16.88583299	22.00201694	0	0	6
1152	TRUE	TRUE	FALSE	0	43817	13	0	1	13.85	1	Male	1	0	16	1	Yes	5	7	5	4400	0.288290641	0.957542953	16.88583299	22.00201694	0	0	6
2101	FALSE	FALSE	TRUE	0	43846	5	0	0	11.4	1	M	3	.	6	0	Non	0	0	30	4429	0.711275752	0.702913085	24.13145919	23.05980163	0	0	2
2402	FALSE	TRUE	FALSE	0	43846	17	0	1	11	0	M	4	.	6	1	Non	0	8	4	4429	0.711275752	0.702913085	24.13145919	23.05980163	0	0	2
2102	TRUE	FALSE	FALSE	1	43847	12	0	1	13.6	1	F	4	.	5	1	Oui	13	0	6	4430	0.723261725	0.69057402	24.87707621	23.08408458	0	0	2
2104	TRUE	FALSE	FALSE	1	43847	9	0	0	12.8	1	M	3	.	5	0	Non	0	0	20	4430	0.723261725	0.69057402	24.87707621	23.08408458	0	0	2
2403	FALSE	TRUE	FALSE	0	43847	14	0	1	14.6	1	M	6	.	6	1	Oui	14	12	5	4430	0.723261725	0.69057402	24.87707621	23.08408458	0	0	2
2105	TRUE	FALSE	FALSE	1	43851	16	0	1	14.3	1	F	0	5	3	0	Non	13	17	8	4434	0.769030859	0.639211653	26.50418702	24.111516	0	0	2
2202	TRUE	FALSE	FALSE	1	43851	24	0	1	15.1	0	M	7	.	3	1	Non	3	5	4	4434	0.769030859	0.639211653	26.50418702	24.111516	0	0	2
2404	TRUE	FALSE	FALSE	1	43851	16	0	1	11.9	1	F	6	.	5	1	Oui	8	0	4	4434	0.769030859	0.639211653	26.50418702	24.111516	0	0	2
2203	FALSE	TRUE	FALSE	0	43852	3	0	0	15.65	1	M	7	.	7	0	Non	0	0	7	4435	0.779912522	0.625888534	26.94051805	24.5193899	0	0	2
2405	TRUE	TRUE	FALSE	0	43852	9	0	1	12.95	0	F	3	.	6	0	Oui	12	4	19	4435	0.779912522	0.625888534	26.94051805	24.5193899	0	0	2
2406	TRUE	FALSE	FALSE	1	43853	10	0	1	11.45	1	M	4	.	4	1	Non	0	0	30	4436	0.790563397	0.612380205	26.76386699	24.74431285	0	0	2
2407	FALSE	TRUE	FALSE	0	43854	16	1	0	15.65	1	F	1	.	9	1	Oui	0	0	13	4437	0.800980331	0.598690663	27.36736507	24.87091534	0	0	2
2110	TRUE	FALSE	FALSE	1	43857	1	0	0	10.65	1	M	3	.	8	1	Non	14	16	15	4440	0.830797017	0.556575527	27.43368254	25.53912294	0	0	2
2408	TRUE	TRUE	FALSE	0	43857	3	0	1	11.55	0	M	3	.	7	1	Oui	8	4	20	4440	0.830797017	0.556575527	27.43368254	25.53912294	0	0	2
2111	TRUE	FALSE	FALSE	1	43858	15	0	1	13.3	1	M	3	.	4	1	Non	0	0	10	4441	0.84024807	0.542202159	26.65614864	25.82381651	0	0	2
2112	TRUE	FALSE	FALSE	1	43858	13	0	1	11.15	1	M	5	.	4	1	Non	0	11	3	4441	0.84024807	0.542202159	26.65614864	25.82381651	0	0	2
2113	TRUE	FALSE	FALSE	1	43858	8	0	0	13.3	1	M	0	15	3	0	Non	0	0	25	4441	0.84024807	0.542202159	26.65614864	25.82381651	0	0	2
2410	FALSE	TRUE	FALSE	0	43858	9	0	0	13.95	1	M	6	.	6	0	Non	9	9	3	4441	0.84024807	0.542202159	26.65614864	25.82381651	0	0	2
2412	TRUE	FALSE	FALSE	1	43859	18	0	1	14.8	1	F	1	.	6	1	Non	9	14	3	4442	0.849450479	0.527668346	25.4672993	26.0950559	0	0	2
2414	TRUE	TRUE	FALSE	0	43860	10	0	1	13.5	1	M	3	.	11	0	Oui	5	7	5	4443	0.858401523	0.512978386	26.71926092	26.21741177	0	0	2
2415	FALSE	FALSE	TRUE	0	43860	5	0	1	11.7	1	M	6	.	3	1	Non	0	10	15	4443	0.858401523	0.512978386	26.71926092	26.21741177	0	0	2
2416	FALSE	FALSE	TRUE	0	43860	16	0	1	11.45	1	F	2	.	5	0	Non	0	6	8	4443	0.858401523	0.512978386	26.71926092	26.21741177	0	0	2
2417	FALSE	TRUE	FALSE	0	43860	36	1	0	14.4	0	F	4	.	11	1	Non	0	0	13	4443	0.858401523	0.512978386	26.71926092	26.21741177	0	0	2
2208	FALSE	TRUE	FALSE	0	43861	10	0	0	13.9	1	F	0	15	5	1	Oui	4	0	4	4444	0.867098552	0.498136628	28.82782886	26.40225475	0	0	2
2418	FALSE	FALSE	TRUE	0	43861	24	0	0	14.25	0	F	3	.	7	1	Non	0	8	14	4444	0.867098552	0.498136628	28.82782886	26.40225475	0	0	2
2116	FALSE	TRUE	FALSE	0	43864	16	0	0	15.6	0	F	0	23	8	1	Non	6	0	5	4447	0.891640195	0.4527447	27.17011258	27.16548468	0	0	2
2117	FALSE	TRUE	FALSE	0	43864	14	0	0	11.35	1	F	0	23	4	0	Non	0	0	30	4447	0.891640195	0.4527447	27.17011258	27.16548468	0	0	2
2118	FALSE	TRUE	FALSE	0	43864	36	0	1	14.3	0	M	2	.	4	1	Non	12	16	12	4447	0.891640195	0.4527447	27.17011258	27.16548468	0	0	2
2211	FALSE	TRUE	FALSE	0	43865	15	0	0	11.75	1	M	2	.	10	1	Non	4	0	17	4448	0.899296192	0.437340096	25.97276107	27.28326476	0	0	2
2421	TRUE	FALSE	FALSE	1	43865	6	0	1	13.35	1	M	5	.	7	0	Non	0	0	8	4448	0.899296192	0.437340096	25.97276107	27.28326476	0	0	2
2422	FALSE	TRUE	FALSE	0	43865	11	0	1	12.85	1	M	3	.	11	1	Oui	9	8	16	4448	0.899296192	0.437340096	25.97276107	27.28326476	0	0	2
2423	FALSE	TRUE	FALSE	0	43866	12	0	1	14.35	1	M	4	.	10	1	Oui	11	9	10	4449	0.906686072	0.421806077	26.66873883	27.24530577	0	0	2
2120	TRUE	FALSE	FALSE	1	43867	8	0	1	15.5	1	F	3	.	4	1	Non	9	0	3	4450	0.91380765	0.406147239	27.24267563	27.22589296	0	0	2
2213	TRUE	TRUE	FALSE	0	43867	20	0	0	14	1	M	3	.	8	1	Non	0	12	17	4450	0.91380765	0.406147239	27.24267563	27.22589296	0	0	2
2214	TRUE	FALSE	FALSE	1	43867	15	0	1	13.25	1	M	0	13	8	1	Oui	5	9	25	4450	0.91380765	0.406147239	27.24267563	27.22589296	0	0	2
2303	TRUE	TRUE	FALSE	0	43867	18	0	0	13.95	0	F	1	.	3	1	Non	0	9	7	4450	0.91380765	0.406147239	27.24267563	27.22589296	0	0	2
2305	FALSE	TRUE	FALSE	0	43867	8	1	0	13.5	1	F	4	.	6	0	Non	0	0	16	4450	0.91380765	0.406147239	27.24267563	27.22589296	0	0	2
2215	TRUE	FALSE	FALSE	1	43868	8	0	0	12.7	1	M	3	.	6	1	Oui	13	13	28	4451	0.920658817	0.390368215	27.13505629	27.26009358	0	0	2
2307	TRUE	FALSE	FALSE	1	43868	13	0	1	13.25	1	M	0	17	4	1	Non	12	16	8	4451	0.920658817	0.390368215	27.13505629	27.26009358	0	0	2
2309	TRUE	FALSE	FALSE	1	43868	15	0	1	13.2	1	M	0	10	3	0	Non	16	13	8	4451	0.920658817	0.390368215	27.13505629	27.26009358	0	0	2
2123	TRUE	FALSE	FALSE	1	43871	10	0	1	14.1	1	F	4	.	6	0	Non	0	0	10	4454	0.939569986	0.342356892	27.91379915	27.06582327	0	0	2
2124	TRUE	FALSE	FALSE	1	43872	9	0	1	15.45	1	M	4	.	6	0	Non	5	12	8	4455	0.945320047	0.326144154	27.89833335	27.10011731	0	0	2
2314	FALSE	TRUE	FALSE	0	43873	8	0	0	14.55	1	M	1	.	8	1	Non	10	15	5	4456	0.950790372	0.309834904	27.07988949	27.18884479	0	0	2
2315	TRUE	TRUE	FALSE	0	43873	11	0	1	13.55	1	F	5	.	3	1	Non	13	14	7	4456	0.950790372	0.309834904	27.07988949	27.18884479	0	0	2
2316	TRUE	FALSE	FALSE	1	43873	6	0	1	13.95	1	M	3	.	3	1	Non	9	12	4	4456	0.950790372	0.309834904	27.07988949	27.18884479	0	0	2
2127	FALSE	TRUE	FALSE	0	43875	24	0	0	14.4	0	M	0	8	3	0	Non	11	14	20	4458	0.960885426	0.276946202	28.48669177	27.41745598	0	0	2
2129	TRUE	FALSE	FALSE	1	43878	9	0	0	12.5	1	F	2	.	4	1	Non	13	16	20	4461	0.973892236	0.227010821	28.75294346	27.4276565	0	0	2
2130	FALSE	TRUE	FALSE	0	43878	16	0	0	14.5	1	M	2	.	4	1	Non	12	13	38	4461	0.973892236	0.227010821	28.75294346	27.4276565	0	0	2
2225	FALSE	TRUE	FALSE	0	43878	14	0	0	13.4	1	M	1	.	3	1	Non	9	0	5	4461	0.973892236	0.227010821	28.75294346	27.4276565	0	0	2
2319	TRUE	FALSE	FALSE	1	43878	13	0	1	13.5	1	F	5	.	4	1	Oui	0	12	7	4461	0.973892236	0.227010821	28.75294346	27.4276565	0	0	2
2433	FALSE	TRUE	FALSE	0	43878	11	0	1	13.95	1	M	2	.	7	0	Oui	9	0	10	4461	0.973892236	0.227010821	28.75294346	27.4276565	0	0	2
2436	FALSE	TRUE	FALSE	0	43878	9	0	0	15.85	1	M	4	.	3	1	Non	0	0	13	4461	0.973892236	0.227010821	28.75294346	27.4276565	0	0	2
2438	TRUE	FALSE	FALSE	1	43879	7	0	1	10.6	1	M	4	.	6	1	Non	0	6	4	4462	0.977653084	0.210224752	29.21981761	27.54071584	0	0	2
2228	FALSE	TRUE	FALSE	0	43880	11	1	0	14.3	1	M	0	12	4	1	Non	0	9	16	4463	0.98112463	0.193376474	29.16641647	27.77264845	0	0	2
2229	TRUE	FALSE	FALSE	1	43880	2	0	0	13.6	1	M	0	14	4	1	Non	0	6	40	4463	0.98112463	0.193376474	29.16641647	27.77264845	0	0	2
2322	FALSE	FALSE	TRUE	0	43880	36	1	0	16.15	0	M	2	.	6	1	Non	16	16	6	4463	0.98112463	0.193376474	29.16641647	27.77264845	0	0	2
2323	TRUE	FALSE	FALSE	1	43880	5	0	1	14.6	1	F	3	.	6	1	Non	9	16	9	4463	0.98112463	0.193376474	29.16641647	27.77264845	0	0	2
2324	TRUE	FALSE	FALSE	1	43881	6	0	0	14.4	1	M	2	.	3	0	Non	0	9	7	4464	0.984305844	0.176470973	30.12285801	27.951054	0	0	2
2137	TRUE	FALSE	FALSE	1	43882	9	0	1	16.1	1	M	0	4	3	0	Non	5	16	12	4465	0.987195787	0.159513252	30.46239423	28.15678131	0	0	2
2230	TRUE	FALSE	FALSE	1	43885	14	0	1	12.65	1	F	4	.	4	0	Non	0	6	7	4468	0.994109865	0.108377013	31.92341471	29.08366636	0	0	2
2325	TRUE	FALSE	FALSE	1	43885	7	0	0	13.5	1	F	1	.	6	1	Oui	12	5	5	4468	0.994109865	0.108377013	31.92341471	29.08366636	0	0	2
2231	TRUE	FALSE	FALSE	1	43886	5	0	0	13.9	1	M	4	.	7	0	Non	8	6	11	4469	0.995827034	0.091260722	31.41932669	29.37006747	0	0	2
2326	TRUE	TRUE	FALSE	0	43886	11	0	1	13.45	1	M	0	6	5	0	Non	0	0	30	4469	0.995827034	0.091260722	31.41932669	29.37006747	0	0	2
2140	TRUE	FALSE	FALSE	1	43887	12	0	0	14.1	1	M	4	.	3	0	Non	0	0	40	4470	0.997249521	0.074117425	30.46592555	29.621567	0	0	2
2233	TRUE	FALSE	FALSE	1	43887	3	0	0	13.8	1	M	0	17	5	0	Non	0	0	6	4470	0.997249521	0.074117425	30.46592555	29.621567	0	0	2
2327	TRUE	FALSE	FALSE	1	43887	18	0	1	15.1	1	M	3	.	3	1	Non	0	0	7	4470	0.997249521	0.074117425	30.46592555	29.621567	0	0	2
2443	FALSE	TRUE	FALSE	0	43887	18	0	1	13.65	0	M	0	15	3	1	Non	0	0	3	4470	0.997249521	0.074117425	30.46592555	29.621567	0	0	2
2141	FALSE	TRUE	FALSE	0	43888	22	0	0	14.1	1	F	2	.	5	1	Non	0	5	3	4471	0.998376906	0.056952196	29.91219827	29.86342672	0	0	2
2328	FALSE	TRUE	FALSE	0	43889	18	0	0	15.3	0	M	6	.	10	0	Non	9	9	20	4472	0.999208856	0.039770114	30.00009901	29.97806749	0	0	2
